# Supplementary material for: Rapid depolymerization of poly(ethylene terephthalate) thin films by a dual-enzyme system and its impact on material properties
Source: PubMed Central journal article supplement — Chem Catal. 2022 Dec 15;2(12):3573–89. doi: 10.1016/j.checat.2022.11.004 (PMC10284027; doi:10.1016/j.checat.2022.11.004), 2022-12-15
Supplement: mmc2.pdf [file mmc2.pdf]

Revision 1.1, Last updated: November 08, 2021

- » *Chem Catalysis* has compiled these checklists to foster improved rigor and reproducibility in research and increased clarity and transparency in data reporting.
- » Authors are encouraged to include the completed checklists as supplemental information at the time of submission. The checklists will be included in the supplemental information of published articles.
- » Rather than check off all items on the list, authors should mark only those items that apply to their article.

## The following checklists are relevant for this manuscript:

### General catalysis checklist

Please note: the general catalysis checklist should be completed for all submissions, including those with biocatalysts, electrochemistry, and photocatalysts

### Biocatalysis checklist

### Electrochemistry checklist

### Photocatalysis checklist

### Sustainability remarks

"Principles of green chemistry" have been considered in designing and conducting the research

For more information, please see <https://www.acs.org/content/acs/en/greenchemistry/principles/12-principles-of-green-chemistry.html>.

I verify that, to the best of my knowledge, this form is completed accurately in agreement with all co-authors

Submitting author name:

For general queries or feedback regarding this form, please email [catalysis@cell.com](mailto:catalysis@cell.com)

Revision 1.1, Last updated: November 08, 2021

## Catalyst synthesis

Novel methods are provided in full detail  
Chemical vendor provided if catalyst was purchased

Comprehensive literature references are included if the synthesis has been previously reported

## Catalyst and new materials characterization

Elemental analysis  
NMR spectroscopy  
High-resolution mass spectrometry (HRMS)  
Infrared spectroscopy  
Crystallography  
Phase and crystallinity  
Morphology  
Chemical composition of the catalyst

Thickness analysis for two-dimensional materials  
Particle size and size distribution  
Characterization and analysis of pore size  
Exposed facets and orientation  
Defect structure  
Analysis of edge or vertex sites  
Analysis of valence state  
Data are available in a repository

## Catalyzed reaction

Reaction conditions and complete experimental procedure provided  
Size and type of reactor (e.g., flow, batch, semi-batch)  
Operating temperature  
Operating pressure  
Solvent

Catalyst loading (mass and/or concentration and reaction volume)  
Atmosphere  
Mass balance  
Reactant concentration at the beginning of reaction  
Mass and/or heat transfer and mixing effects

## Catalytic activity

Reaction kinetics  
Turnover frequency  
Turnover number

Product selectivity  
Space-time yield  
Kinetics of deactivation

## Catalyst stability assessment

Long-term stability test, including test conditions  
Recyclability test  
Catalyst identity, loading, or purity were assessed post reaction (e.g. SEM, TEM, XRD, ICP, etc; details provided)

## Control and benchmarking experiments

Reaction without catalyst  
Reaction without additives  
Benchmarking table or figure (either other catalysts investigated in this study or previous literature reports with references)

## Product or compound characterization

### Identity

Integrated  $^1\text{H}$  and  $^{13}\text{C}$  NMR spectra provided  
Multiplicity and coupling constants provided in-text  
Other NMR experimentation provided  
High resolution mass spectral data  
Infrared (IR) absorption spectroscopy  
UV-vis spectroscopy  
Chiral chromatography (GC and/or HPLC)  
X-ray diffraction (powder and/or single crystal)

### Purity

Isolated yields  
High-field  $^1\text{H}$  NMR spectra  
1D proton-decoupled  $^{13}\text{C}$  NMR spectra  
Combustion elemental analysis  
Quantitative GC or HPLC analytical data  
Electrophoretic analytical data  
Sequence (biomacromolecules)  
Dispersity (polymers)

## Quantification and statistical analysis

The paper reports statistical analysis

There is a statement as to what (if any) methods were used to determine if the data met the assumptions of the statistical approach

The statistical parameters (e.g., exact value of  $n$  samples, standard error of the mean, standard deviation) are reported in the paper

## Computational analysis

Calculations were conducted  
Software details, including version number  
Details of all basis sets and exchange-correlation functionals or wave function methods  
Force-field parameters  
Temperature and/or pressure (if non-standard conditions)  
Coordinates, calculated energies, and lowest frequency of all stationary points  
Intrinsic reaction coordinate to confirm transition states

Data and code are available in a repository  
Convergence criteria of the force and energy  
Definitions of computed physical quantities and description of all corrections to electronic energies  
Ensemble  
k-point and supercell size  
Simulation cell details (if periodic calculations) or details if using molecular dynamics or Monte Carlo  
Pseudopotential

## Other

The [biocatalysis checklist](#) is relevant for this work

The [photocatalysis checklist](#) is relevant for this work

Other information is relevant for the general catalysis or general characterization reported in this manuscript (if so, please provide details below)

The [electrochemistry checklist](#) is relevant for this work

Revision 1.1, Last updated: November 08, 2021

## General conditions

The [General Catalysis checklist](#) has been completed

## Catalyst identity

The name from the IUBMB Enzyme List to identify the enzyme is provided

The NCBI Taxonomy ID is provided

A naturally occurring variant

The localization within the cell

Any post-translational modification are detailed

The full protein sequence and the appropriate NCBI GenBank or UniProt accession code is provided

Gene identifiers

Expression modules (i.e., regulatory sequences)

Plasmids used for expression

Mutations within the gene or protein sequence (and an indication of whether the sequences are wild-type, synthetic and/or evolved)

## Preparation

Novel methods are provided in full

Metalloenzyme

Comprehensive literature references are included if the synthesis has been previously reported

Artificial modification

Enzyme or protein purity

## Storage and Propagation conditions

Storage solution

Storage temperature

Atmosphere if not air

pH (if stored in solution)

Buffer and concentrations (including counter-ion)

Metal salt(s) and concentrations

Enzyme or protein concentration

Details regarding thawing procedure

Propagation medium

Propagation temperature

Antibiotic resistances

Statement about observed loss of activity under any of the preceding conditions

## Assay conditions

Substrate identity, purity, and concentrations

Buffer and concentrations

Metal salt(s) and concentrations

Total ionic strength of assay mixture

Enzyme or protein concentration

Coupled assay components

Assay temperature, pressure, medium, and pH

Atmosphere if not air

Culture vessel (e.g., flask, bioreactor, microtiter plate)

Measured reaction provided as stoichiometrically balanced equation

## Activity/Performance

Measurements of initial rates of the reaction  
Specific substrate consumption rate  $q_s$  (in mol/g<sub>CDW</sub>/h)  
Volumetric productivity  $Q_p$  (in kg/L/h or mol/L/hr)  
Proportionality between initial velocity and enzyme concentration

Turnover number  
Specific product formation rate  $q_p$  (in mol/g<sub>CDW</sub>/h)  
Enzyme activity expressed as  $k_{cat}$  (in s<sup>-1</sup> or min<sup>-1</sup>) or international unit (1 IU = 1 μmol min<sup>-1</sup>); katal (mol/s) may alternatively be used as a unit of activity (conversion factor 1 unit = 16.67 nkat)

## Methodology

Assay method  
Type of assay  
Reaction-stopping procedure  
Direction of the assay  
Reactant determined  
Concentrations of free metal cations

Reaction equilibrium constant  
Pathway intermediates  
By-products  
Analytic methods for the detection of metabolites  
*If applicable:* molecular cloning techniques  
*If applicable:* recombinant DNA delivery techniques

## Kinetic or physiological parameters

$k_{cat}$  (in s<sup>-1</sup> or min<sup>-1</sup>)  
 $V_{max}$   
 $S_{0.5}$  as concentration (e.g., mM)  
High-substrate inhibition, if observed, with  $K_i$  value  
Biomass yield on carbon substrate  $Y_{x/s}$  (either g<sub>CDW</sub>/g or g<sub>CDW</sub>/mol)  
Substrate toxicity (minimum inhibitory concentration - MIC in g/L or mol/L)  
*If applicable:* tolerance to solvent concentrations (minimum inhibitory concentration - MIC in g/L or mol/L)

$K_m$  units or concentration necessary (e.g., mM)  
 $k_{cat}/K_m$  as concentration per time (e.g., mM<sup>-1</sup> s<sup>-1</sup>)  
Model used to determine the parameters  
Growth rate  $\mu$  (in h<sup>-1</sup>) or doubling time  $t_D$  in h  
Hill coefficient, saturation ratio (RS), or other coefficients of cooperativity  
(By-)product toxicity (minimum inhibitory concentration - MIC in g/L or mol/L)

## Inhibition or activation data

Time dependence and reversibility

Inhibition ( $K_i$  units necessary)

## Other

Other information is relevant for the biocatalysis reported in this manuscript (if so, please provide details below)

Revision 1.1, Last updated: November 08, 2021

## General conditions

The [General Catalysis checklist](#) has been completed

## Reaction conditions provided

Cell type (H-cell, gas-diffusion type, etc.)

Cell, electrode, and membrane material

Electrode geometric area (cm<sup>2</sup>)

Scan rate for cyclic voltammograms

Reactants

Three-electrode or two-electrode configuration (half-cell or full cell, respectively)

Bias potential and, for three-cell configuration, the reference electrode used

Currents

Dependence of current on scan or stir rate

Treatment or polishing of the electrode

pH for aqueous solutions (start, during reaction, end)

Electrolyte

Mass transfer conditions (rotation rate for rotating disc electrode; stir bar, flow rate in flow cells)

## Data reported

Vendor information, photographs, and/or schemes of any custom apparatus

Normalized electrochemical surface area activity

Electrochemical impedance spectroscopy (EIS)

Mass activity

Specific activity

Mass balance

Polarization plot (cell voltage versus current or current density)

Electrochemically active surface area (ECSA, A/cm<sup>2</sup><sub>ECSA</sub>)

Stability test conditions

Current densities

Faradaic efficiency

Overpotential (including clear information about how the thermodynamic potential was determined, estimated, or calculated)

## Other

Other information is relevant for the electrochemistry reported in this manuscript (if so, please provide details below)

Revision 1.1, Last updated: November 08, 2021

## General conditions

The [General Catalysis checklist](#) has been completed

## Reaction conditions provided

Vendor information, photographs, and/or schemes of any custom apparatus and reaction setup

Photocatalyst loading

Substrate concentration

Sacrificial donor

Other additives

Reaction vessel size, material, and thickness of glassware

Total optical power impinging on the sample if liquid ( $\text{mW}\cdot\text{mL}^{-1}$ )

Source and wavelength of light used for illumination

Wavelength distribution of light

Hole or electron scavengers

Optical irradiance at the sample ( $\text{mW}\cdot\text{cm}^{-2}$ )

## Data reported

Quantum yields

Photocatalytic efficiencies

Apparent quantum yields or photonic efficiencies

## Control experiments conducted

Reaction without catalyst

Reaction without light (on/off test and reaction conducted completely in the dark)

Stern-Volmer or other quenching experiments

## Other

Other information is relevant for the photocatalysis reported in this manuscript (if so, please provide details below)
